# Supplementary material
Source: publisher figshare collection journal article supplement (https://gsapubs.figshare.com/ndownloader/files/34817803)
Supplement: Supplementary file 1 [file 34817803]

SUPPLEMENT

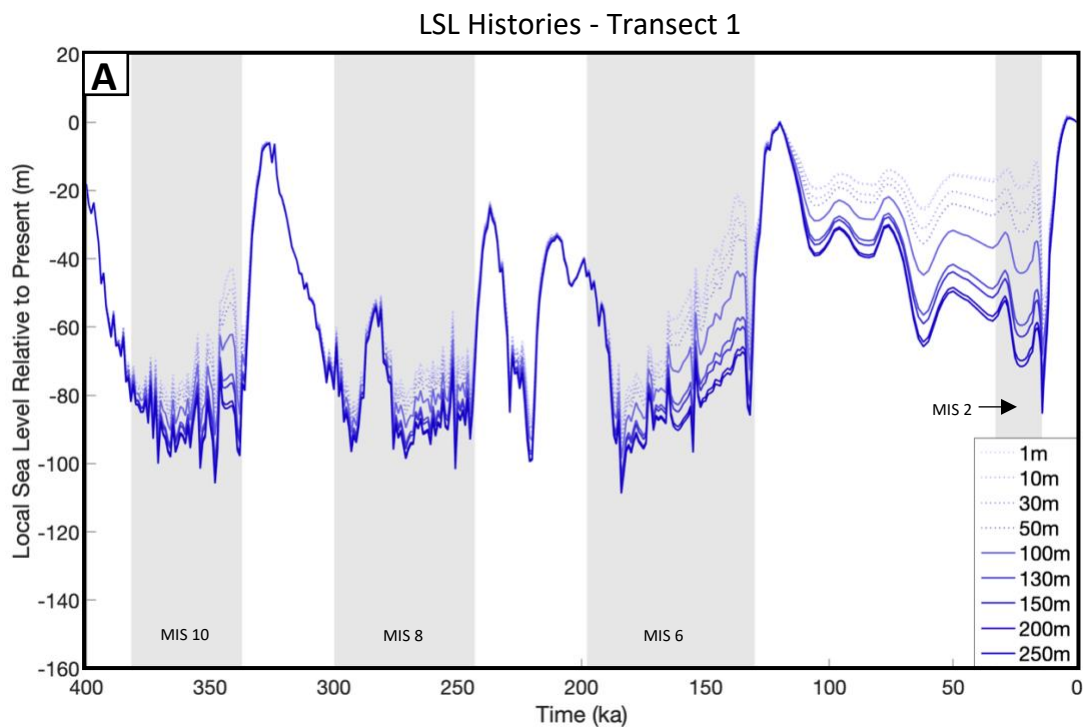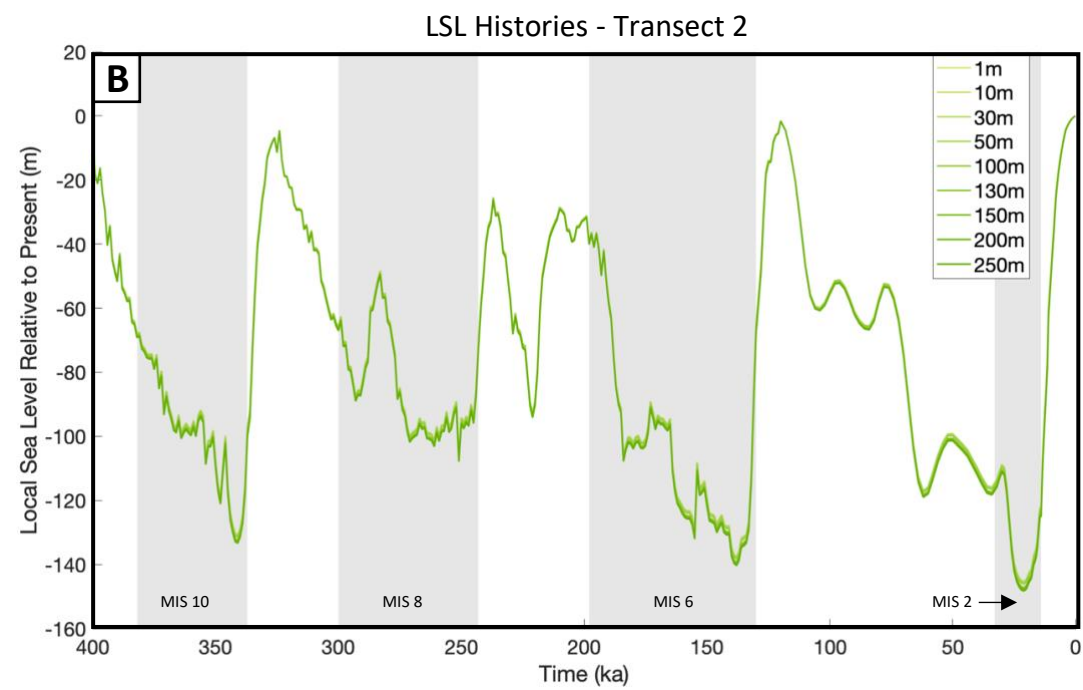

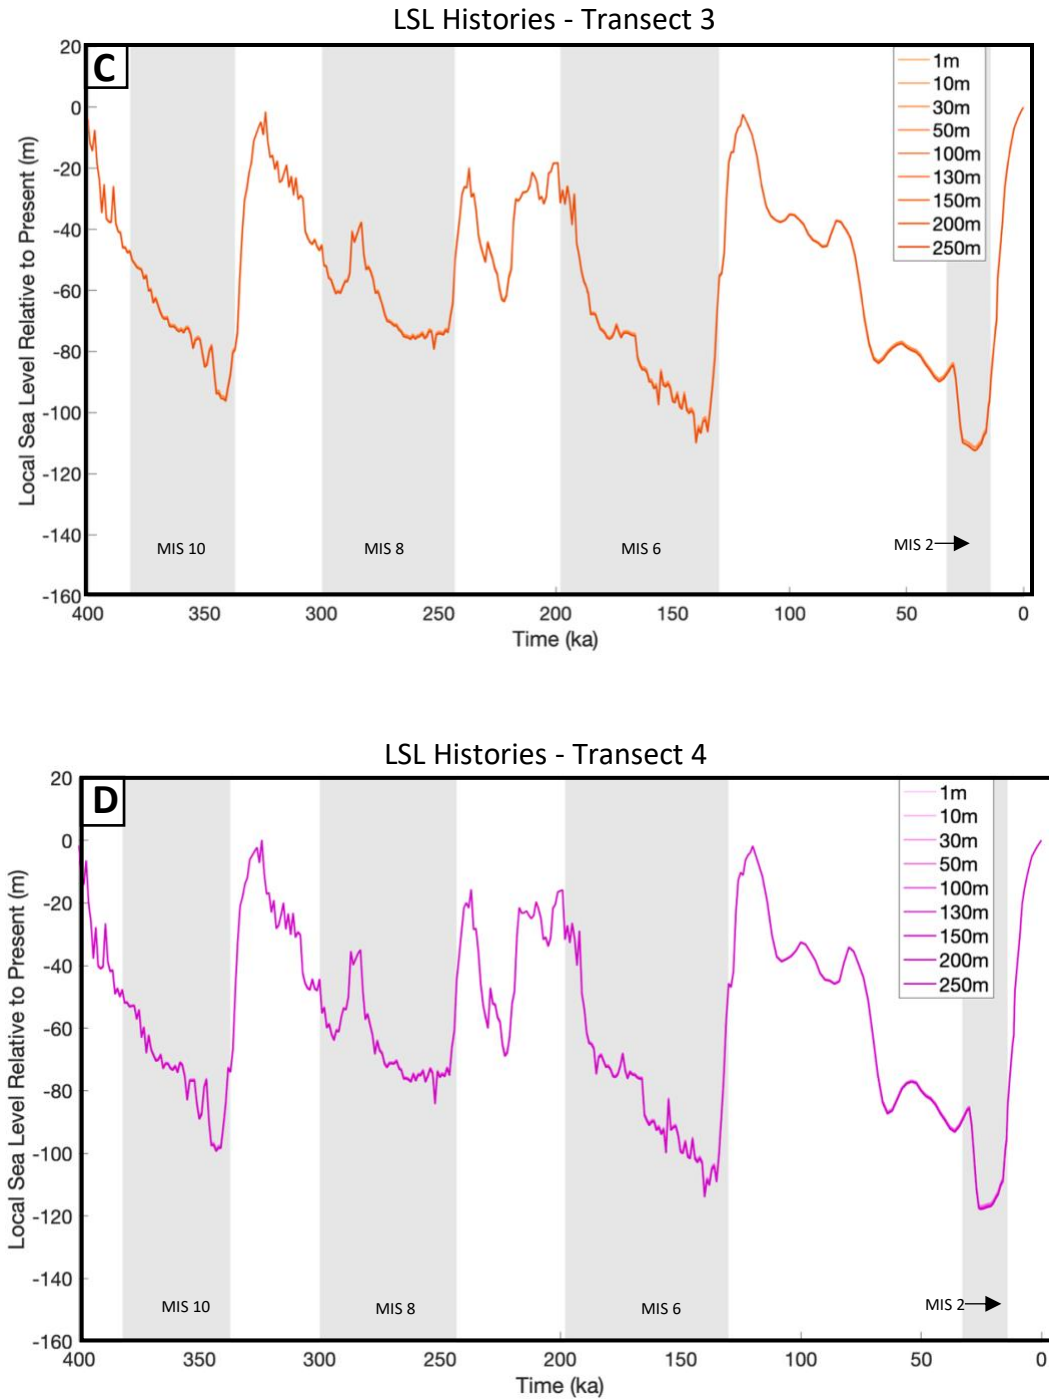

Figure S1. MIS 11 to present-day local sea level (LSL) histories for all nine depth-sites (1 - 250 m, see inset key) along each individual transect (T<sub>1</sub>-T<sub>4</sub>, see Fig. 1a). Transects are in order from north to south. The darker the color of the line, the further the site to the present-day shoreline. (A) LSL histories along T<sub>1</sub> vary during glacial periods (up to 55 m around 25 ka), but coalesce into a single line during interglacial periods. Dotted lines represent periods where sites 1-50 m were overridden by ice. (B-G) LSL histories along T<sub>2</sub>-T<sub>4</sub> display very little variation during glacial periods (<5 m), and amalgamate into a single line during interglacial periods. See main text for a physical description of the differences between the LSL histories.

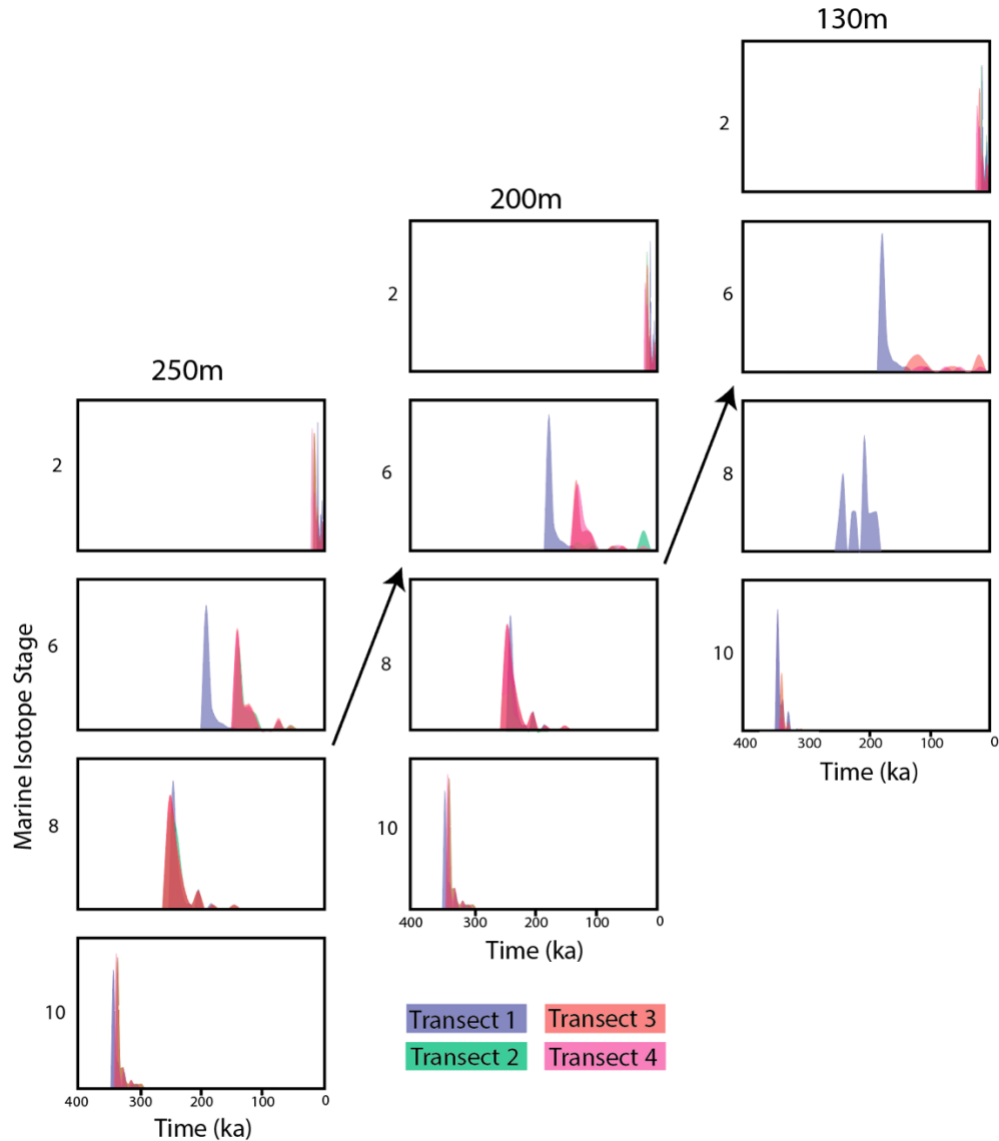

Figure S2. Glacial isostatic adjustment produces diachronous subaerial unconformities and correlative conformities (MIS 2 – 10). Actual model age distributions for subaerial unconformities/correlative conformities representing MIS 2, 6, 8 and 10 glacial low stands at the (from left to right) 250, 200, and 130 m depth-sites along T<sub>1</sub> (blue), T<sub>2</sub> (green), T<sub>3</sub> (red) and T<sub>4</sub> (magenta). At each depth, MIS 10 and MIS 2 are the least variable, with peak ages only differing by up to ~10 ky between transects. However, this peak age difference dramatically increases with MIS 6 where depth ages can vary by up to ~150 ky, with T<sub>1</sub> appearing the earliest (Fig. 4). With respect to MIS 8 the 250 m and 200 m sites have similar ages, but up-dip at the 130 m site only T<sub>1</sub> is preserved. T<sub>2</sub> does not preserve MIS 6, 8, or 10 at the 130 m site.

Table S1. Mean count of genetic stratigraphic sequences. Values are derived from all 50 model runs at each site. Green boxes indicate statistically significant ( $p < 0.05$ ) differences in mean when compared to the same depth-site along other transects. The count of sequences varies the most at the intermediate depth sites. The deeper the site, the higher the count of sequences.

| Mean Count of Genetic Stratigraphic Surfaces |       |       |       |       |       |      |
|----------------------------------------------|-------|-------|-------|-------|-------|------|
| Transect                                     | 250 m | 200 m | 150 m | 130 m | 100 m | 50 m |
| 1                                            | 4.98  | 4.98  | 4.96  | 4.84  | 3     | 2    |
| 2                                            | 5     | 4.64  | 2.45  | 2     | 2     | 2    |
| 3                                            | 5     | 5     | 4.37  | 3.61  | 2     | 2    |
| 4                                            | 5     | 5     | 4.08  | 3.27  | 2     | 2    |

Table S2. The mean apparent water-depth change preserved in model regressive systems tracts leading into glacial maxima (MIS 2 - 10). T<sub>1</sub> underestimates the change in eustatic sea level, whereas T<sub>3</sub> overestimates the same metric.

| Mean Apparent Change in Water Depth Leading to a Glacial Maximum (m) |          |         |         |         |         |        |      |
|----------------------------------------------------------------------|----------|---------|---------|---------|---------|--------|------|
| MIS                                                                  | Transect | 250 m   | 200 m   | 150 m   | 130 m   | 100 m  | 50 m |
| 2                                                                    | 1        | -88.05  | -91.16  | -79.97  | -77.74  | -48.91 |      |
|                                                                      | 2        | -138.55 | -108.24 | -70.88  |         |        |      |
|                                                                      | 3        | -111.07 | -104.58 | -88.933 | -91.99  |        |      |
|                                                                      | 4        | -111.34 | -99.2   | -104.72 | -104.26 |        |      |
| MIS                                                                  | Transect | 250 m   | 200 m   | 150 m   | 130 m   | 100 m  | 50 m |
| 6                                                                    | 1        | -59.13  | -61.22  | -83.85  | -71.29  | -49.38 |      |
|                                                                      | 2        | -114.41 | -126.4  | -96.82  |         |        |      |
|                                                                      | 3        | -92.45  | -92.78  | -99.27  | -95.37  |        |      |
|                                                                      | 4        | -98.51  | -98.41  | -92.16  | -98.84  |        |      |
| MIS                                                                  | Transect | 250 m   | 200 m   | 150 m   | 130 m   | 100 m  | 50 m |
| 8                                                                    | 1        | -85.5   | -84.66  | -71.86  | -76.19  | -53.46 |      |
|                                                                      | 2        | -92.07  | -83.39  |         |         |        |      |
|                                                                      | 3        | -76.73  | -76.29  | -63.74  |         |        |      |
|                                                                      | 4        | -80.35  | -79.95  | -66.81  |         |        |      |
| MIS                                                                  | Transect | 250 m   | 200 m   | 150 m   | 130 m   | 100 m  | 50 m |
| 10                                                                   | 1        | -65.35  | -64.74  | -62.95  | -56.76  | -59.67 |      |
|                                                                      | 2        | -97.52  | -85.23  |         |         |        |      |
|                                                                      | 3        | -77.77  | -79.71  | -73.85  | -44.45  |        |      |
|                                                                      | 4        | -76.55  | -78.51  | -70     | -31.54  |        |      |
